# Supplementary material for: Influence of aromatic heterocycle of conjugated side chains on photovoltaic performance of benzodithiophene-based wide-bandgap polymers
Source: Royal Society of Chemistry journal article supplement (doi:10.1039/c6py00640j), 2016-01-01
Supplement: c6py00640j1.pdf [file c6py00640j1.pdf]

Electronic Supplementary Information For

**Influence of Aromatic Heterocycle of Conjugated Side Chains on  
Photovoltaic Performance of Benzodithiophene-Based Wide-Bandgap  
Polymers**

Xiaonan Xue,<sup>a,b</sup> Bingbing Fan,<sup>b</sup> Tao Liu,<sup>b</sup> Xiaobo Sun,<sup>\*b</sup> Lijun Huo,<sup>\*b</sup> Su Ryong Ha,<sup>c</sup>  
Hyosung Choi,<sup>c</sup> Taehyo Kim,<sup>d</sup> Jin Young Kim,<sup>d</sup> Donghui Wei,<sup>e</sup> Mingming Yu,<sup>e</sup>  
Qionghua Jin,<sup>\*a</sup> and Yanming Sun<sup>\*b</sup>

<sup>a</sup> Department of Chemistry, Capital Normal University, Beijing 100048, P. R. China. E-mail: jinqh@mail.cnu.edu.cn

<sup>b</sup> Heeger Beijing Research and Development Center, School of Chemistry and Environment, Beihang University, Beijing 100191, P. R. China. E-mail: sunxb@buaa.edu.cn; huolijun@buaa.edu.cn; sunym@buaa.edu.cn

<sup>c</sup> Department of Chemistry, Institute for Materials Design and Research Institute for Convergence of Basic Sciences, Hanyang University, Seoul 133-791, South Korea.

<sup>d</sup> School of Energy and Chemical Engineering, Ulsan National Institute of Science and Technology, Ulsan 689-798, South Korea.

<sup>e</sup> The College of Chemistry and Molecular Engineering, Zhengzhou University, Zhengzhou, Henan Province 450001, P. R. China.

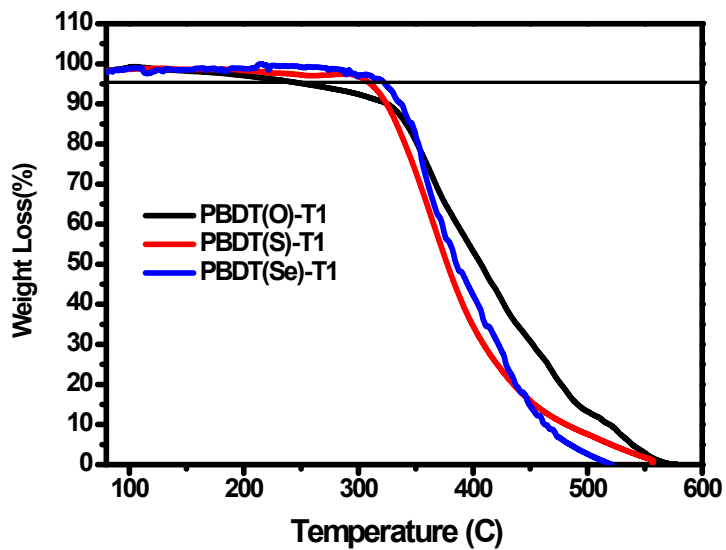

Figure S1. TGA thermograms of the three polymers with a heating rate of  $10^{\circ}\text{C min}^{-1}$  under nitrogen atmosphere.

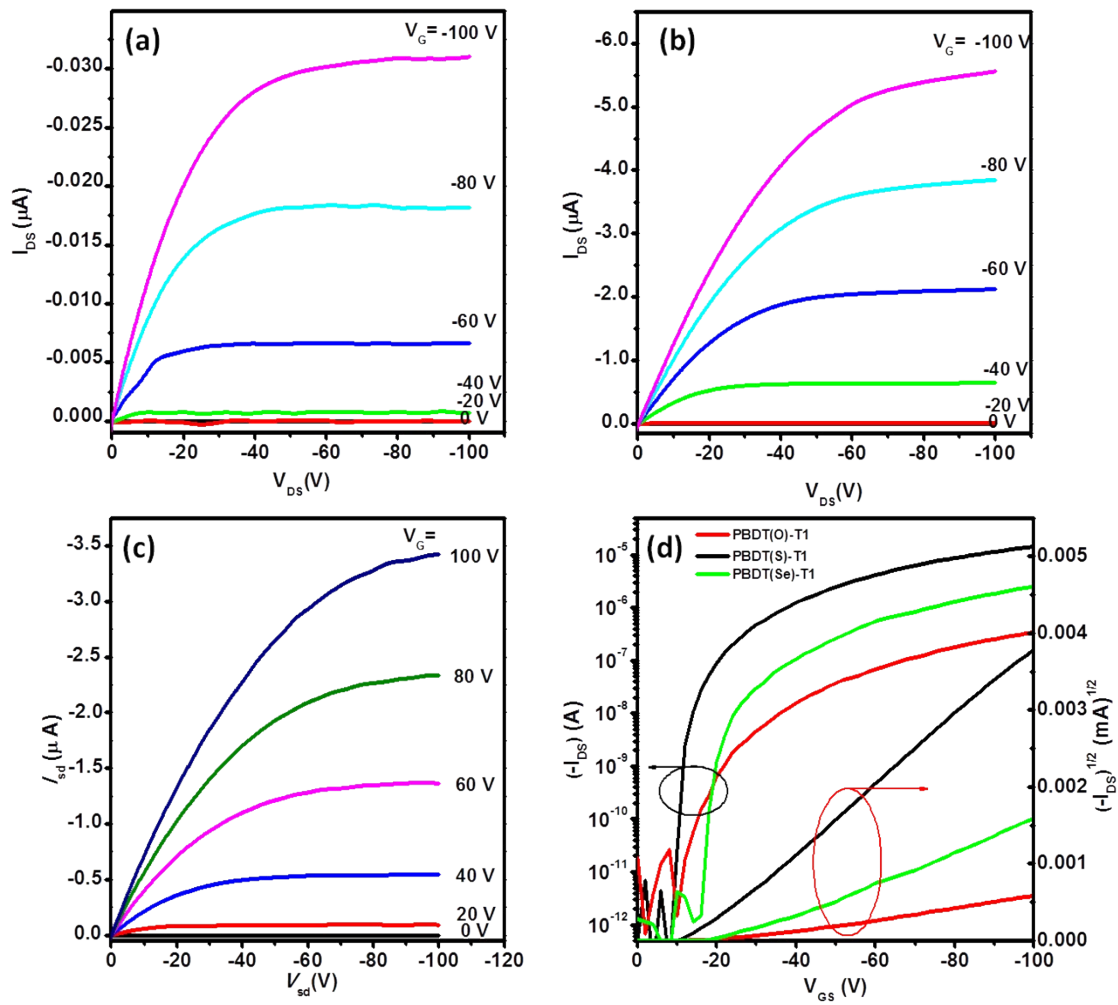

Figure S2. Current–voltage characteristics of OFET devices fabricated with PBDT(X)-T1: (a-c) Output curves of OFET devices based on PBDT(O)-T1, PBDT(S)-T1 and PBDT(Se)-T1; (d) Transfer curves of OFET devices.

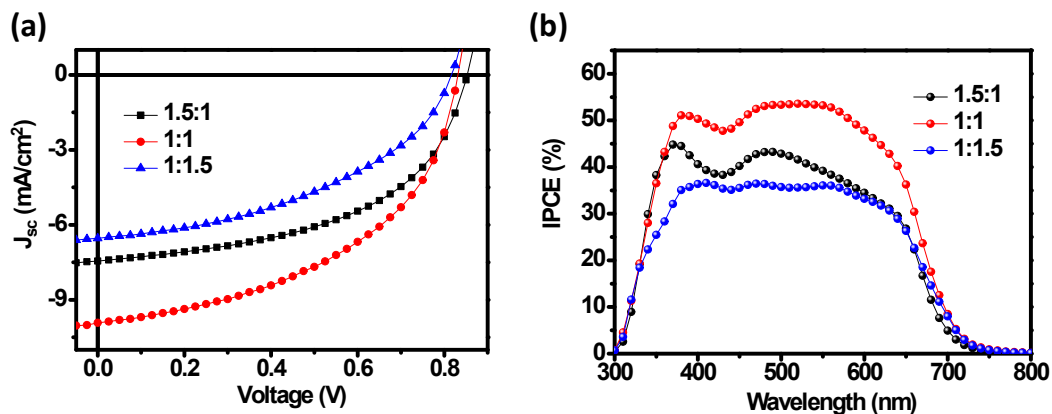

Figure S3. (a) Current density-voltage characteristics and (b) IPCE spectra of PBDT(O)-T1/PC<sub>70</sub>BM solar cells with different weight ratios.

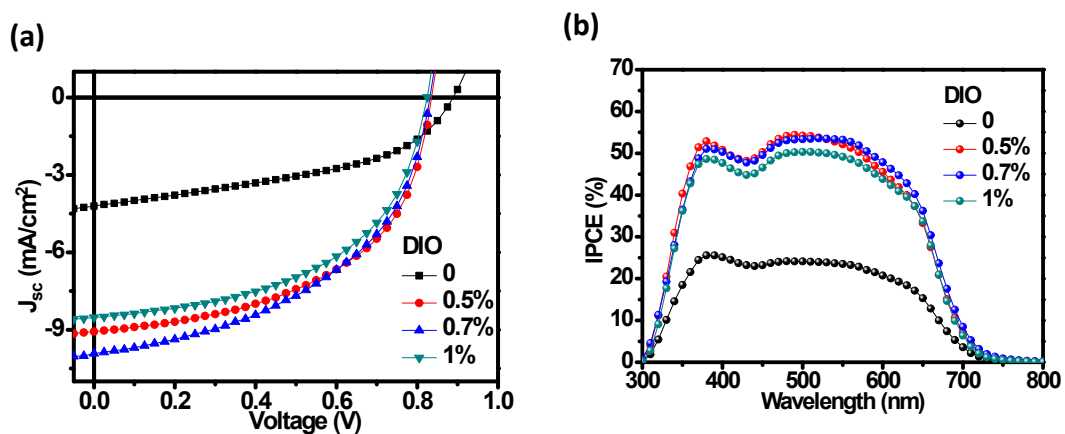

Figure S4. (a) Current density-voltage characteristics and (b) IPCE spectra of PBDT(O)-T1:PC<sub>70</sub>BM solar cells with different DIO concentration at the blend weight ratio of 1:1.

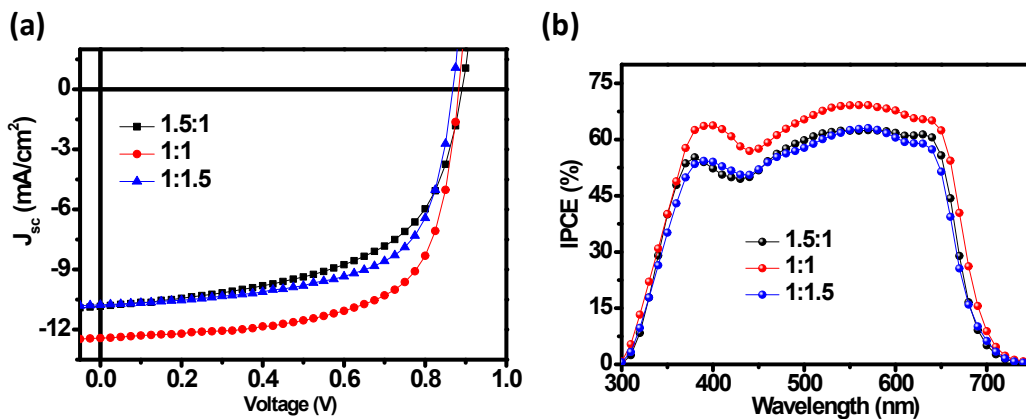

Figure S5. (a) Current density-voltage characteristics and (b) IPCE spectra of PBDT(S)-T1/PC<sub>70</sub>BM solar cells with different weight ratios.

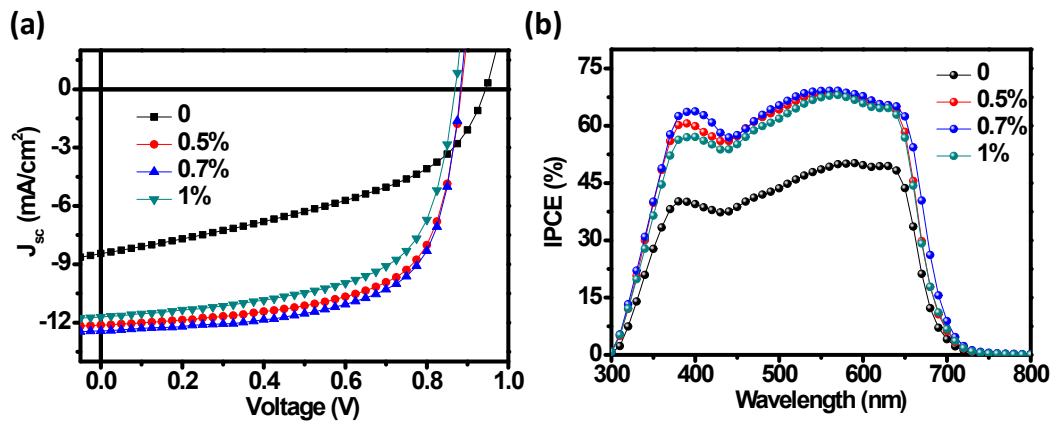

Figure S6. (a) Current density-voltage characteristics and (b) IPCE spectra of PBDT(S)-T1:PC<sub>70</sub>BM solar cells with different DIO concentration at the blend weight ratio of 1:1.

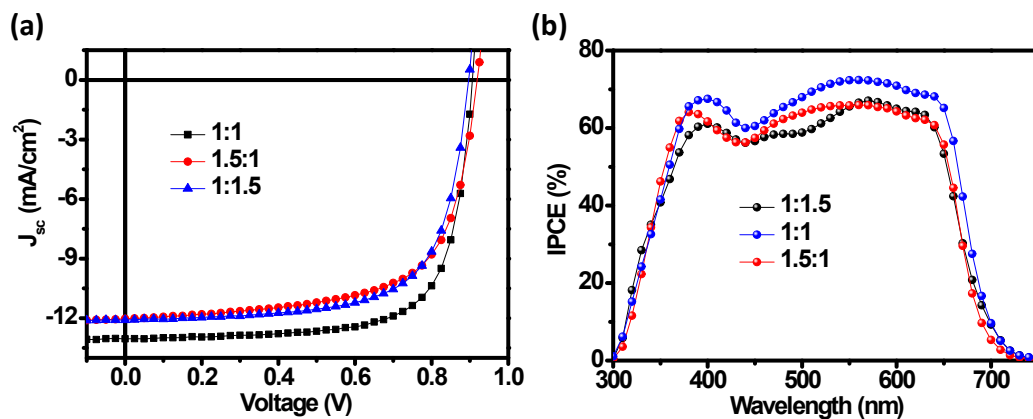

Figure S7. (a) Current density-voltage characteristics and (b) IPCE spectra of PBDT(Se)-T1/PC<sub>70</sub>BM solar cells with different weight ratios.

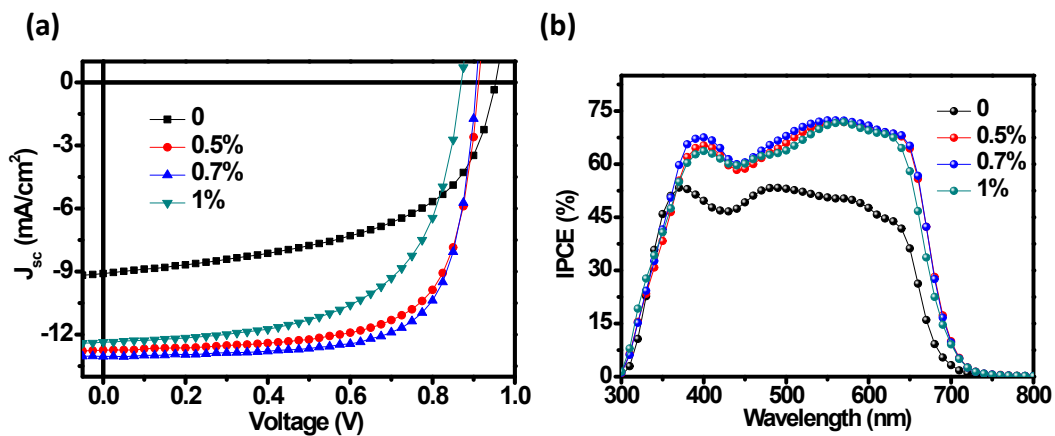

Figure S8. (a) Current density-voltage characteristics and (b) IPCE spectra of PBDT(Se)-T1:PC<sub>70</sub>BM solar cells with different DIO concentration at the blend weight ratio of 1:1.

Table S1. Photovoltaic performance of solar cells based on different weight ratios of PBDT(X)-T1: PC<sub>70</sub>BM in a conventional structure under the illumination of AM1.5G, 100 mW/cm<sup>2</sup>.

| Active layer                    | Weight ratios (w/w) | V <sub>oc</sub> (V) | J <sub>sc</sub> (mA/cm <sup>2</sup> ) | FF   | PCE (%) |
|---------------------------------|---------------------|---------------------|---------------------------------------|------|---------|
| PBDT(O)-T1:PC <sub>70</sub> BM  | 1:1.5               | 0.82                | 6.54                                  | 0.44 | 2.36    |
|                                 | 1:1                 | 0.83                | 9.92                                  | 0.49 | 4.01    |
|                                 | 1.5:1               | 0.85                | 7.45                                  | 0.52 | 3.28    |
| PBDT(S)-T1:PC <sub>70</sub> BM  | 1:1.5               | 0.87                | 10.76                                 | 0.64 | 6.01    |
|                                 | 1:1                 | 0.88                | 12.43                                 | 0.68 | 7.48    |
|                                 | 1.5:1               | 0.89                | 10.84                                 | 0.57 | 5.48    |
| PBDT(Se)-T1:PC <sub>70</sub> BM | 1:1.5               | 0.9                 | 12.09                                 | 0.68 | 7.43    |
|                                 | 1:1                 | 0.91                | 13.04                                 | 0.72 | 8.52    |
|                                 | 1.5:1               | 0.92                | 11.53                                 | 0.68 | 7.23    |

Table S2. Photovoltaic performance of solar cells based on PBDT(X)-T1: PC<sub>70</sub>BM (1:1, w/w) with different DIO additive contents in a conventional structure under the illumination of AM1.5G, 100 mW/cm<sup>2</sup>.

| Active layer                    | DIO (V/V, %) | V <sub>oc</sub> (V) | J <sub>sc</sub> (mA/cm <sup>2</sup> ) | FF   | PCE (%) |
|---------------------------------|--------------|---------------------|---------------------------------------|------|---------|
| PBDT(O)-T1:PC <sub>70</sub> BM  | 0            | 0.89                | 4.21                                  | 0.45 | 1.67    |
|                                 | 0.5          | 0.83                | 9.07                                  | 0.53 | 4.00    |
|                                 | 0.7          | 0.83                | 9.92                                  | 0.49 | 4.01    |
|                                 | 1.0          | 0.82                | 8.52                                  | 0.53 | 3.7     |
| PBDT(S)-T1:PC <sub>70</sub> BM  | 0            | 0.94                | 8.45                                  | 0.44 | 3.52    |
|                                 | 0.5          | 0.88                | 12.13                                 | 0.65 | 7.01    |
|                                 | 0.7          | 0.88                | 12.43                                 | 0.68 | 7.48    |
|                                 | 1.0          | 0.87                | 11.72                                 | 0.62 | 6.37    |
| PBDT(Se)-T1:PC <sub>70</sub> BM | 0            | 0.95                | 9.10                                  | 0.54 | 4.68    |
|                                 | 0.5          | 0.91                | 12.74                                 | 0.70 | 8.10    |
|                                 | 0.7          | 0.91                | 13.04                                 | 0.72 | 8.52    |
|                                 | 1.0          | 0.87                | 12.36                                 | 0.61 | 6.55    |
